# Supplementary material
Source: Springer Nature journal article supplement (https://www.springermedizin.de/resource/supplementary/12885_2014_5135_MOESM8_ESM.pdf/9467904)

17q23-25 amplification

9

19

miR-21 overexpression

7

10

PTEN protein loss

4

2

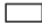

17q23-25  
amplification (+)

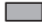

17q 23-25  
amplification (-)

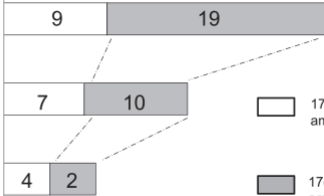

Supplement: MOESM8 [file 9467904]
